# Supplementary material
Source: Springer Nature journal article supplement (https://www.springermedizin.de/resource/supplementary/12987_2013_79_MOESM5_ESM.docx/9680284)
Supplement: MOESM5 [file 9680284]

| **Table 2. TNFα and IFNγ-induced modulation of gene expression profile of cultured human brain endothelium** | | | | | |
| --- | --- | --- | --- | --- | --- |
| **CATEGORY** | **TERM** | **COUNT** | **PValue** | **FOLD ENR. BONFERRONI** | **BENJAMINI** |
| KEGG_PATHWAY | HLA/CAM | 20 | 1.91E-08 | 2.31E-06 | 5.79E-07 |
| KEGG_PATHWAY | Cytokine/Chemokine activity | 28 | 2.80E-08 | 3.375373382 | 3.38E-06 |
| KEGG_PATHWAY | cytokine-induced signalling pathways | 16 | 4.34E-07 | 5.26E-05 | 4.78E-06 |
| KEGG_PATHWAY | Complement and coagulation cascades | 8 | 0.005613018 | 0.493934113 | 0.041674727 |
| KEGG_PATHWAY | Apoptosis | 9 | 0.005713793 | 0.500102261 | 0.039964864 |

| **continue Table 2** | | | |
| --- | --- | --- | --- |
| **Chemokines** | | | |
| **ACCESSION** | **SYMBOL** | **FOLD-CHANGE OR REGULATION** | **ADJ.P.VAL** |
| NM_001040138.1 | CKLF | -1.560 | 0.000035 |
| NM_001040139.1 | CKLF | -1.445 | 0.000385 |
| NM_000609.4 | CXCL12 | - | 1.77E-05 |
| NM_001338.3 | CXADR | - | 7.07E-05 |
| NM_145898.1 | CCL23 | - | 0.018426597 |
| NM_199168.2 | CXCL12 | - | 2.97E-06 |
| NM_001565.2 | CXCL10 | 167.240 | 3.42E-09 |
| NM_002036.2 | DARC | 4.855 | 1.27E-05 |
| NM_002089.3 | CXCL2 | 3.576 | 1.64E-07 |
| NM_002982.3 | CCL2 | 38.559 | 2.00E-07 |
| NM_002985.2 | CCL5 | 35.166 | 2.84E-11 |
| NM_002996.3 | CX3CL1 | 25.551 | 3.90E-09 |
| NM_022059.1 | CXCL16 | 3.175 | 5.92E-08 |
| NM_001511.1 | CXCL1 | + | 4.98E-06 |
| NM_002416.1 | CXCL9 | + | 9.19E-12 |
| NM_002993.2 | CXCL6 | + | 5.27E-07 |
| NM_002994.3 | CXCL5 | + | 8.82E-05 |
| NM_004591.1 | CCL20 | + | 2.30E-08 |
| NM_005623.2 | CCL8 | + | 1.02E-11 |
| **Interleukins** | | | |
| **ACCESSION** | **SYMBOL** | **FOLD-CHANGE OR REGULATION** | **ADJ.P.VAL** |
| NM_138284.1 | IL17D | -2.571 | 1.15E-05 |
| NM_001560.2 | IL13RA1 | -2.185 | 1.79E-06 |
| NM_004512.3 | IL11RA | -1.874 | 6.35E-05 |
| NM_000572.2 | IL10 | -1.299 | 0.008634538 |
| NM_004512.3 | IL11RA | -1.223 | 0.013733677 |
| NM_000565.2 | IL6R | -1.200 | 0.025617916 |
| NM_000565.2 | IL6R | -1.129 | 0.074339811 |
| NM_152456.1 | IL34 | 1.224 | 0.03412512 |
| NM_173843.1 | IL1RN | 1.251 | 0.016566058 |
| NM_014439.3 | IL1F7 | 1.255 | 0.010561836 |
| NM_000576.2 | IL1B | 1.281 | 0.002274156 |
| NM_004843.2 | IL27RA | 1.350 | 0.002341774 |
| NM_000882.2 | IL12A | 1.375 | 0.000232668 |
| NM_153701.1 | IL12RB1 | 1.391 | 0.000282523 |
| NM_000585.2 | IL15 | 1.399 | 0.001212931 |
| NM_153701.1 | IL12RB1 | 1.562 | 2.60E-05 |
| NM_002185.2 | IL7R | 1.592 | 3.60E-05 |
| NM_000575.3 | IL1A | 1.665 | 1.38E-05 |
| NM_002183.2 | IL3RA | 1.703 | 8.68E-05 |
| NM_002189.2 | IL15RA | 1.904 | 2.33E-05 |
| NM_003855.2 | IL18R1 | 2.087 | 0.000237793 |
| NM_003856.2 | IL1RL1 | 2.340 | 7.18E-05 |
| NM_173042.2 | IL18BP | 2.583 | 4.27E-07 |
| NM_000600.1 | IL6 | 3.225 | 3.61E-07 |
| NM_002189.2 | IL15RA | 3.575 | 1.91E-08 |
| NM_003856.2 | IL1RL1 | 3.928 | 1.36E-05 |
| NM_172374.1 | IL4I1 | 9.878 | 3.42E-09 |
| NM_173042.2 | IL18BP | 19.573 | 7.35E-10 |
| NM_001012636.1 | IL32 | 23.343 | 1.05E-10 |
| NM_001012633.1 | IL32 | 24.945 | 5.18E-10 |
| NM_000584.2 | IL8 | 56.262 | 3.62E-09 |
| **Cell adhesion molecules** | | | |
| **ACCESSION** | **SYMBOL** | **FOLD-CHANGE OR REGULATION** | **ADJ.P.VAL** |
| NM_000442.3 | PECAM1 | -1.706 | 0.021712033 |
| NM_001099786.1 | ICAM2 | -1.537 | 0.002696545 |
| NM_002162.2 | ICAM3 | -1.319 | 0.003817802 |
| NM_032801.3 | JAM3 | -1.577 | 0.000226073 |
| NM_138961.1 | ESAM | -2.639 | 0.000525608 |
| NM_001024912.1 | CEACAM1 | 5.388 | 3.22E-08 |
| NM_001024912.1 | CEACAM1 | 6.520 | 5.56E-08 |
| NM_001078.2 | VCAM1 | 52.031 | 5.93E-09 |
| NM_005010.3 | NRCAM | 1.961 | 3.19E-06 |
| NM_005010.3 | NRCAM | 2.310 | 3.55E-06 |
| NM_175573.1 | *ADRM1 | 1.490 | 0.000372749 |
| NM_000201.1 | ICAM1 | + | 0.000178645 |
| NM_001712.3 | CEACAM1 | + | 9.98E-08 |
| NM_001627.2 | ALCAM | N | 0.822056005 |
| NM_006500.2 | MCAM | N | 0.121193353 |
| NM_024003.1 | L1CAM | N | 0.111091182 |
| NM_016174.3 | CERCAM | N | 0.603205212 |
| NM_021189.2 | CADM3 | N | 0.678687481 |
| NM_175573.1 | *ADRM1 | N | 0.097286675 |
| - Indicates downregulation below detection levels in cytokine-treated cells, + indicates upregulation from below detection levels in control cells, N indicates no changes between control and cytokine-treated cells and * indicates transcript showing different results with different probes. | | | |
